# Supplementary material
Source: PubMed Central journal article supplement (PMC5559287)
Supplement: NIHMS884512-supplement-1.pdf [file NIHMS884512-supplement-1.pdf]

## **Supplemental Inventory**

Supplemental Figures  
Figure S1-S7

Supplemental Tables  
Table S1-S6

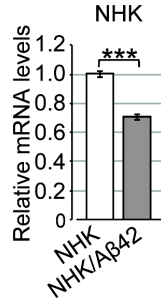

**Figure S1. Co-expression of A $\beta$ 42 does not increase mRNA levels of null Hong Kong  $\alpha$ -1 antitrypsin (NHK) transgene, Related to Figure 1**

mRNA levels of NHK in heads of flies expressing NHK alone (NHK) or co-expressing NHK and A $\beta$ 42 (NHK/A $\beta$ 42) in neurons were analyzed by qRT-PCR. Data are presented as means  $\pm$  SEM,  $n = 4$ , \*\*\*  $p < 0.001$  by Student's  $t$ -test. The flies used in these experiments were 7 days old. The genotypes of the flies were: (NHK): *elav-GAL4/Y; UAS-NHK/CyO* and (NHK/A $\beta$ 42): *elav-GAL4/Y; UAS-NHK/UAS-A $\beta$ 42*.

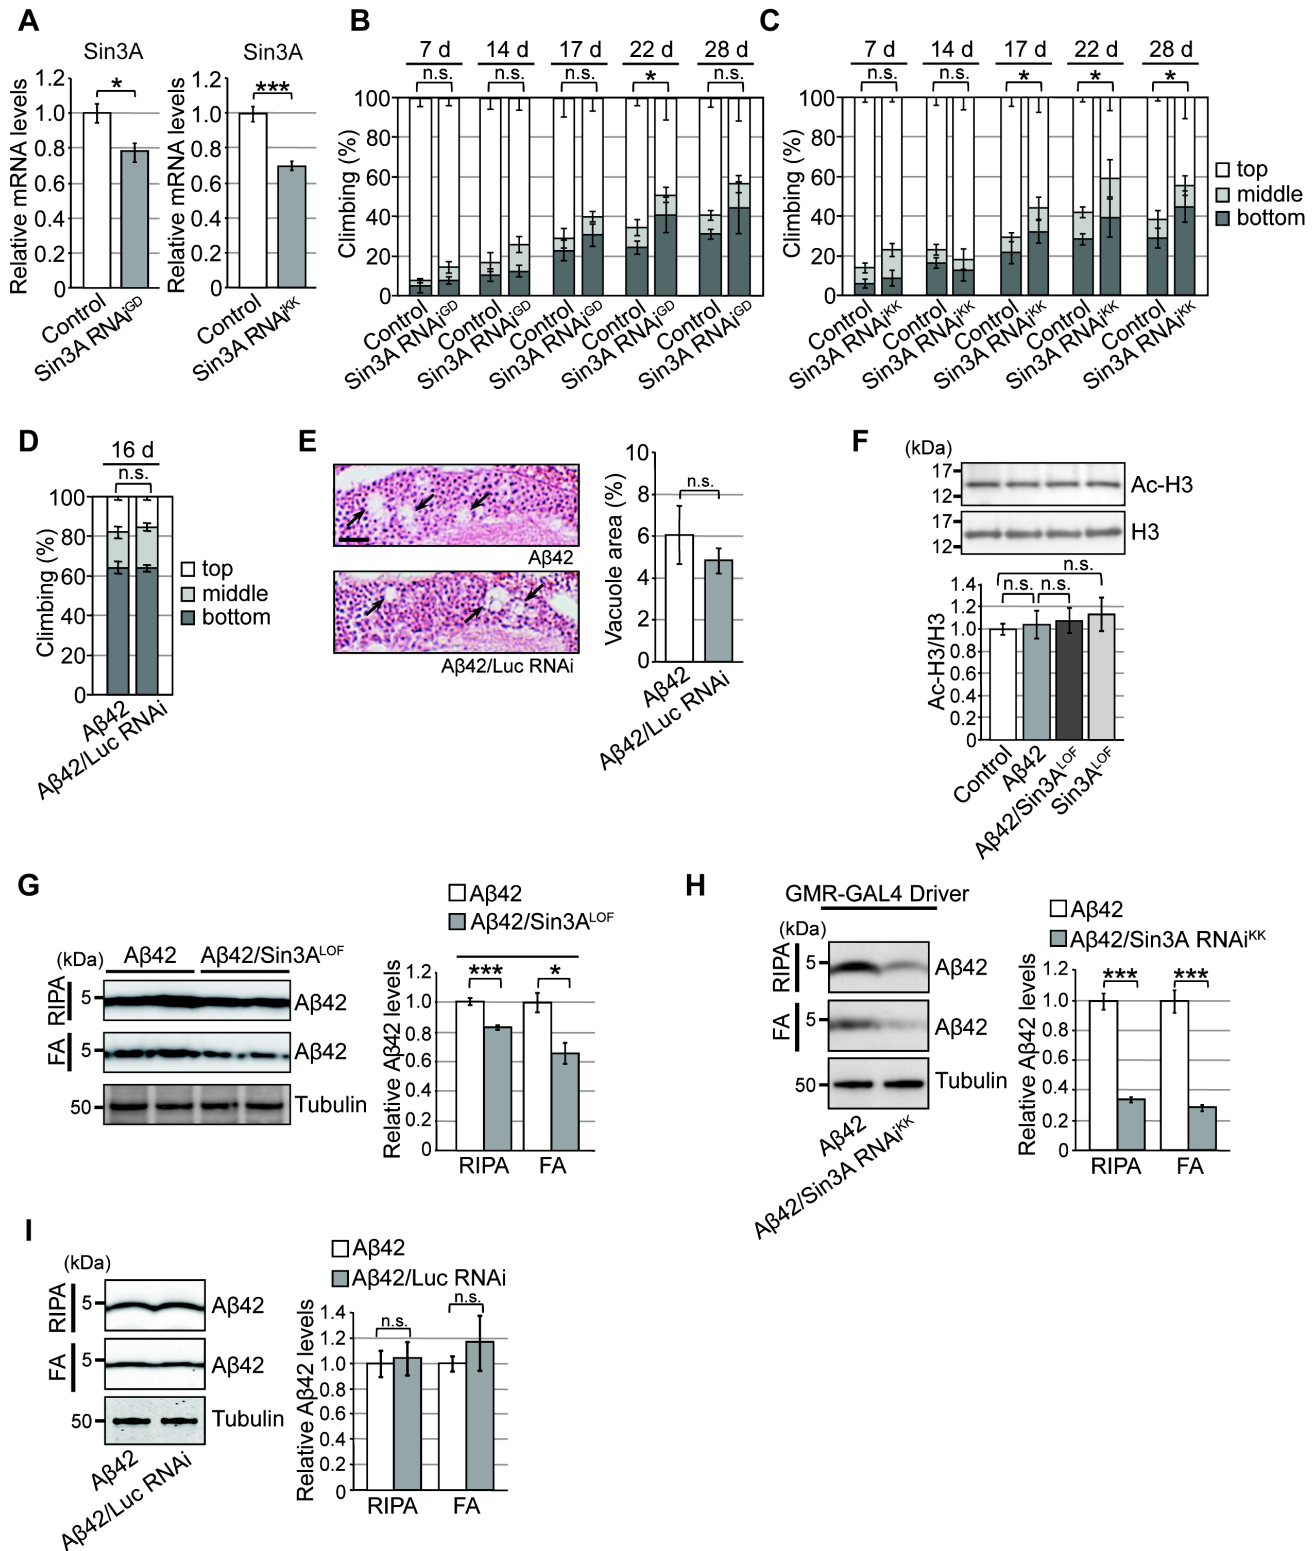

**Figure S2. Neuronal knockdown of Sin3A protects against chronic ER proteinopathy in Aβ42 fly brains, Related to Figure 2**

(A) mRNA levels of Sin3A in heads of flies carrying the elav-GAL4 driver (Control) or carrying both the elav-GAL4 driver and UAS-Sin3A RNAi (Sin3A RNAi<sup>GD</sup> and Sin3A RNAi<sup>KK</sup>) were analyzed by qRT-PCR. Data are presented as means ± SEM, n = 4, \* p < 0.05, \*\*\* p < 0.001 by Student's t-test. Sin3A RNAi did not

result in complete ablation of mRNA levels in either line because endogenous Sin3A is ubiquitously expressed and the RNAi transgenes were only expressed in neurons. The flies used in these experiments were 2 days old. The genotypes of the flies were: (Control): elav-GAL4/Y; +/+, (Sin3A RNAi<sup>GD</sup>): elav-GAL4/Y; UAS-Sin3A RNAi<sup>GD</sup>/+ and (Sin3A RNAi<sup>KK</sup>): elav-GAL4/Y; UAS-Sin3A RNAi<sup>KK</sup>/+. **(B-C)** RNAi-mediated knockdown of Sin3A (Sin3A RNAi<sup>GD</sup> and Sin3A RNAi<sup>KK</sup>) in neurons did not improve, but rather slightly worsened locomotor functions in flies. Data are presented as means  $\pm$  SD, n = 5. \* $p$  < 0.05 by Mann-Whitney U test. n.s.: not significant. The age of the flies (d, days after eclosion) used in these experiments are indicated on the top of the graph. The genotypes of the flies were: (Control): elav-GAL4/Y; +/+, (Sin3A RNAi<sup>GD</sup>): elav-GAL4/Y; UAS-Sin3A RNAi<sup>GD</sup>/+ and (Sin3A RNAi<sup>KK</sup>): elav-GAL4/Y; UAS-Sin3A RNAi<sup>KK</sup>/+. **(D-E)** Neuronal expression of luciferase RNAi (Luc RNAi) did not suppress A $\beta$ 42-induced locomotor defects and neurodegeneration. For **(D)**, data are presented as means  $\pm$  SD, n = 5, n.s.: not significant (Student's *t*-test). The age of the flies (d, days after eclosion) used in this experiment is indicated on the top of the graph. For **(E)**, the percentages of vacuole areas (indicated by arrows in the images) in fly brain cortices are shown. Data are presented as means  $\pm$  SEM, n = 9–12 hemispheres. Scale bar: 10  $\mu$ m. n.s.: not significant (Student's *t*-test). The flies used in this experiment were 24 days old. The genotypes of the flies were: (A $\beta$ 42): elav-GAL4/Y; UAS-A $\beta$ 42/+ and (A $\beta$ 42/Luc RNAi): elav-GAL4/Y; UAS-A $\beta$ 42/UAS-luciferase RNAi. **(F)** Neither A $\beta$ 42 expression nor Sin3A mutation altered histone acetylation levels. Heads of flies carrying the elav-GAL4 driver (Control), expressing A $\beta$ 42 (A $\beta$ 42), expressing A $\beta$ 42 with the Sin3A<sup>LOF</sup> (A $\beta$ 42/Sin3A<sup>LOF</sup>) or carrying the Sin3A<sup>LOF</sup> (Sin3A<sup>LOF</sup>) were analyzed by western blotting with anti-acetyl histone H3 (Ac-H3) and anti-histone H3 (H3) antibodies. Data are presented as means  $\pm$  SEM, n = 4, n.s.: not significant (Student's *t*-test). The flies used in this experiment were 24 days old. The genotypes of the flies were: (Control): elav-GAL4/Y; +/+, (A $\beta$ 42): elav-GAL4/Y; UAS-A $\beta$ 42/+, (A $\beta$ 42/Sin3A<sup>LOF</sup>): elav-GAL4/Y; UAS-A $\beta$ 42/Sin3A<sup>08269</sup>, (Sin3A<sup>LOF</sup>): elav-GAL4/Y; Sin3A<sup>08269</sup>/+. **(G)** Heterozygous loss-of-function mutation of the Sin3A reduced A $\beta$ 42 levels in fly brains. Detergent-soluble (RIPA) and -insoluble (FA) fractions made from heads of flies expressing A $\beta$ 42 alone (A $\beta$ 42) or A $\beta$ 42 with heterozygous loss-of-function mutation of Sin3A (A $\beta$ 42/Sin3A<sup>LOF</sup>), were analyzed by western blotting with an anti-A $\beta$  antibody. Tubulin was used as the loading control. Data are presented as means  $\pm$  SEM, n = 3-4, \* $p$  < 0.05, \*\*\* $p$  < 0.001 by Student's *t*-test. The flies used in these experiments were 26 days old. The genotypes of the flies were: (A $\beta$ 42): elav-GAL4/+; UAS-A $\beta$ 42/+, (A $\beta$ 42/Sin3A<sup>LOF</sup>): elav-GAL4/+; UAS-A $\beta$ 42/Sin3A<sup>08269</sup>. **(H)** RNAi-mediated knockdown of the Sin3A reduced A $\beta$ 42 levels in fly eyes. RIPA and FA fractions made from heads of flies expressing A $\beta$ 42 (A $\beta$ 42) or co-expressing A $\beta$ 42 and Sin3A RNAi (A $\beta$ 42/Sin3A RNAi<sup>KK</sup>) driven by the eye-specific driver GMR-GAL4 were analyzed by western blotting with an anti-A $\beta$  antibody. Tubulin was used as the loading control. Representative blots and quantifications of A $\beta$ 42 levels are shown. Data are presented as means  $\pm$  SEM, n = 4, \*\*\* $p$  < 0.001 by Student's *t*-test. The flies used in these experiments were 7 days old. The genotypes of the flies were: (A $\beta$ 42): GMR-GAL4/+; UAS-A $\beta$ 42/+ and (A $\beta$ 42/Sin3A RNAi<sup>KK</sup>): GMR-GAL4/UAS-Sin3A RNAi<sup>KK</sup>; UAS-A $\beta$ 42/+. **(I)** Expression of luciferase RNAi in neurons did not reduce A $\beta$ 42 levels in fly brains. RIPA and FA fractions from fly heads expressing A $\beta$ 42 (A $\beta$ 42) or co-expressing A $\beta$ 42 and luciferase RNAi (A $\beta$ 42/Luc RNAi) were analyzed by western blotting with an anti-A $\beta$  antibody. Tubulin was used as the loading control. Representative blots and quantifications of A $\beta$ 42 levels are shown. Data are presented as means  $\pm$  SEM, n = 3, n.s.: not significant (Student's *t*-test). The flies used in these experiments were 12 days old. The genotypes of the flies were: (A $\beta$ 42): elav-GAL4/Y; UAS-A $\beta$ 42/+ and (A $\beta$ 42/Luc RNAi): elav-GAL4/Y; UAS-A $\beta$ 42/UAS-luciferase RNAi.

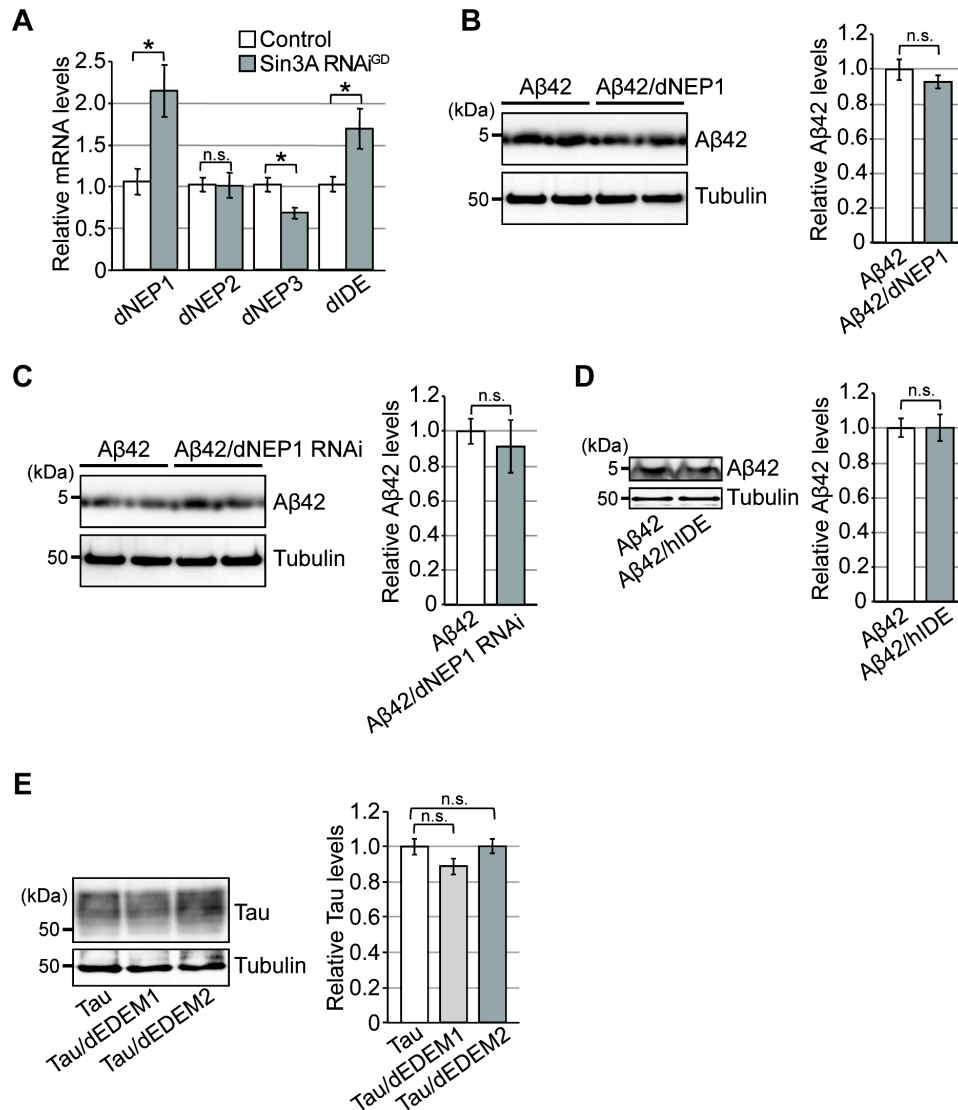

**Figure S3. Reductions in Aβ42 levels are not mediated by fly homologs of mammalian Aβ-degrading enzymes, Related to Figure 3**

(A-D) Fly homologs of mammalian Aβ-degrading enzymes did not mediate reductions in Aβ42 levels induced by Sin3A knockdown. (A) There are five neprilysin family genes (dNEP1-5) in *Drosophila*. Based on amino acid sequence homology comparisons, dNEP1 (CG5905) and dNEP2 (CG9761) are the closest fly homologs of human neprilysin and dNEP3 (CG9565) is the closest homolog of endothelin converting enzyme 1 and 2. In addition, *Drosophila* has a single homolog of insulin degrading enzymes (dIDE, CG5517). Neuronal knockdown of Sin3A increased the mRNA levels of dNEP1 and dIDE. The mRNA levels in heads of flies carrying the elav-GAL4 driver (Control) or expressing Sin3A RNAi (Sin3A RNAi<sup>GD</sup>) were analyzed by qRT-PCR. Data are presented as means ± SEM, n = 5, \*p < 0.05 by Student's *t*-test. The flies used in these experiments were 2 days old. (B-C) Neither overexpression of dNEP1 (B) nor RNAi-mediated knockdown of dNEP1 (C) in neurons altered Aβ42 levels in fly brains. Heads of flies expressing Aβ42 (Aβ42), co-expressing Aβ42 and dNEP1 (Aβ42/dNEP1), or co-expressing Aβ42 and dNEP1 RNAi (Aβ42/dNEP1 RNAi) were analyzed by western blotting with an anti-Aβ antibody. Tubulin was used as the loading control. Representative blots and quantifications of Aβ42 levels are shown. Data are presented as means ± SEM, n = 4, n.s.: not significant (Student's *t*-test). The flies used in these

experiments were 3 days old. **(D)** Overexpression of IDE in neurons did not alter A $\beta$ 42 levels in fly brains. Fly heads expressing A $\beta$ 42 (A $\beta$ 42) or co-expressing A $\beta$ 42 and human IDE (A $\beta$ 42/hIDE1) were analyzed by western blotting with an anti-A $\beta$  antibody. Tubulin was used as the loading control. Representative blots and quantifications of A $\beta$ 42 levels are shown. Data are presented as means  $\pm$  SEM, n = 5, n.s.: not significant (Student's *t*-test). The flies used in these experiments were 7 days old. The genotypes of the flies were: (Control): elav-GAL4/Y; +/+, (Sin3A RNAi<sup>GD</sup>): elav-GAL4/Y; UAS-Sin3A RNAi<sup>GD</sup>/+, (A $\beta$ 42): elav-GAL4/Y; UAS-A $\beta$ 42/+, (A $\beta$ 42/dNEP1): elav-GAL4/Y; UAS-A $\beta$ 42/+; UAS-dNEP1/+, (A $\beta$ 42/dNEP1 RNAi): elav-GAL4/Y; UAS-A $\beta$ 42/+; UAS-dNEP1 RNAi/+, (A $\beta$ 42/hIDE): elav-GAL4/Y; UAS-A $\beta$ 42/+; UAS-hIDE<sup>18-10</sup>/+. **(E)** Overexpression of neither dEDEM1 nor dEDEM2 reduced the levels of human tau protein in fly eyes. Heads of flies expressing human tau (Tau), co-expressing tau and dEDEM1 (Tau/dEDEM1), or co-expressing tau and dEDEM2 (Tau/dEDEM2) driven by the pan-retinal GMR-GAL4 driver were analyzed by western blotting with an anti-tau antibody. Tubulin was used as the loading control. Representative blots and quantifications of tau levels are shown. Data are presented as means  $\pm$  SEM, n = 3, n.s.: not significant (Student's *t*-test). The flies used in this experiment were 1 day old. The genotypes of the flies were: (Tau): +/Y; GMR-GAL4, UAS-tau/+, (Tau/dEDEM1): +/Y; GMR-GAL4, UAS-tau/+; UAS-dEDEM1/+ and (Tau/dEDEM2): +/Y; GMR-GAL4, UAS-tau/+; UAS-dEDEM2/+.

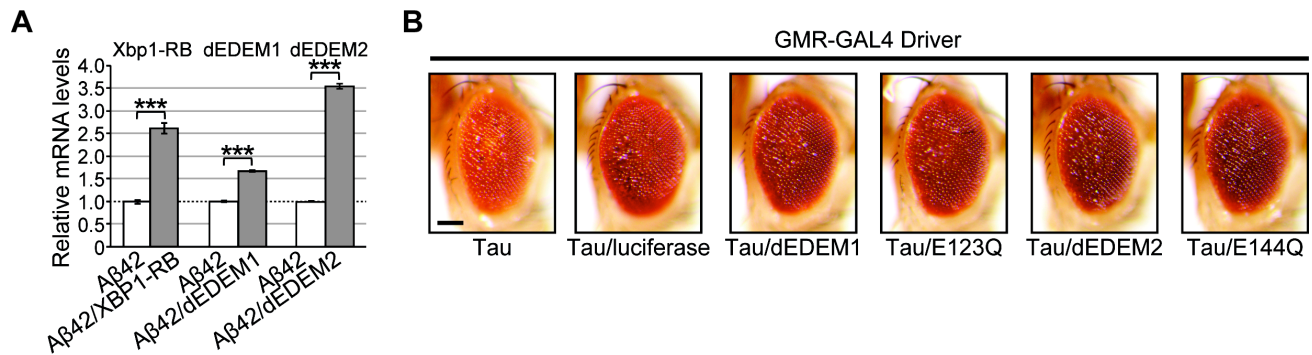

**Figure S4. Overexpression of dEDEMs does not protect against retinal degeneration induced by human microtubule-associated protein tau, Related to Figure 4**

(A) Fold increases in the corresponding mRNA levels of Xbp1-RB and dEDEMs transgenes were analyzed by qRT-PCR in heads from flies expressing Aβ42 (Aβ42), co-expressing Aβ42 and Xbp1-RB (Aβ42/Xbp1-RB), co-expressing Aβ42 and dEDEM1 (Aβ42/dEDEM1), or co-expressing Aβ42 and dEDEM2 (Aβ42/dEDEM2), respectively. Compared with the non-transgenic control, Xbp1-RB overexpression caused a 2.5-fold increase in brain mRNA levels, EDEM1 overexpression caused a 1.6-fold increase, and EDEM2 overexpression caused a 3.5-fold increase. Thus, the levels of overexpression of the mRNAs of these transgenes were comparable. Data are presented as means ± SEM, n = 4, \*\*\* p < 0.001 by Student's *t*-test. The flies used in these experiments were 9 days old (Xbp1-RB) and 14 days old (dEDEM1 and dEDEM2). The genotypes of the flies were: (Aβ42): elav-GAL4/Y; UAS-Aβ42/+, (Aβ42/Xbp1-RB): elav-GAL4/Y; UAS-Aβ42/+; UAS-Xbp1-RB/+, (Aβ42/dEDEM1): elav-GAL4/Y; UAS-Aβ42/+; UAS-dEDEM1/+ and (Aβ42/dEDEM2): elav-GAL4/Y; UAS-Aβ42/+; UAS-dEDEM2/+. (B) Overexpression of dEDEMs did not show any protective effect against the rough eye phenotypes induced by microtubule-associated protein tau. Fly eyes expressing human tau alone (Tau) or co-expressing human tau and luciferase, a control protein, (Tau/luciferase) or co-expressing human tau and dEDEMs (Tau/dEDEM1, Tau/E123Q, Tau/dEDEM2, Tau/E144Q) driven by the eye-specific driver GMR-GAL4 were shown. Scale bar: 100 μm. The flies used in these experiments were 7 days old. The genotypes of the flies were: (Tau): +/+; GMR-GAL4, UAS-tau/+, (Tau/luciferase): +/+; GMR-GAL4, UAS-tau/+; UAS-luciferase/+, (Tau/dEDEM1): +/+; GMR-GAL4, UAS-tau/+; UAS-dEDEM1/+, (Tau/E123Q): +/+; GMR-GAL4, UAS-tau/+; UAS-dEDEM1-E123Q/+, (Tau/dEDEM2): +/+; GMR-GAL4, UAS-tau/+; UAS-dEDEM2/+ and (Tau/E144Q): +/+; GMR-GAL4, UAS-tau/+; UAS-dEDEM2-E144Q/+.

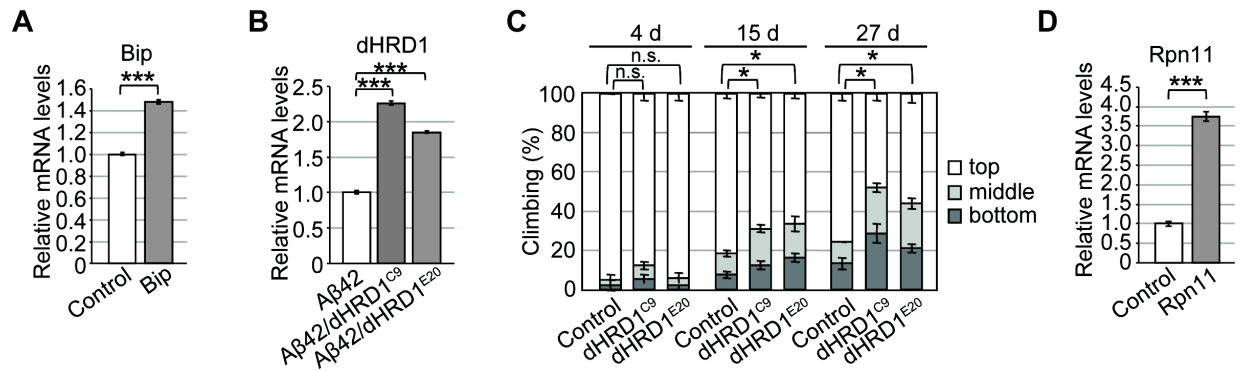

**Figure S5. Expression of Bip, dHRD1 or Rpn11 transgene in fly brains, and the effects of neuronal overexpression of dHRD1 on locomotor functions, Related to Figure 5**

(A, B and D) mRNA expression levels of Bip, *Drosophila* HRD1 (dHRD1<sup>C9</sup> and dHRD1<sup>E20</sup>), or Rpn11 transgenes in fly brains. Fold increases in the corresponding mRNA levels in heads of flies expressing Bip, dHRD1 or Rpn11 in neurons were analyzed by qRT-PCR. Data are presented as means  $\pm$  SEM,  $n = 4$ , \*\*\*  $p < 0.001$  by Student's  $t$ -test. The flies used in these experiments were 7 days old (Bip and Rpn11) and 27 days old (dHRD1). The genotypes of the flies were: (Control): elav-GAL4/Y; +/+, (Bip): elav-GAL4/Y; UAS-Bip/+, (A $\beta$ 42): elav-GAL4/Y;;UAS-A $\beta$ 42/+, (A $\beta$ 42/dHRD1<sup>C9</sup>): elav-GAL4/Y; UAS-dHRD1<sup>C9</sup>/+; UAS-A $\beta$ 42/+, (A $\beta$ 42/dHRD1<sup>E20</sup>): elav-GAL4/Y; ; UAS-dHRD1<sup>E20</sup>/UAS-A $\beta$ 42 and (Rpn11): elav-GAL4/Y; UAS-Rpn11/+. (C) The effects of neuronal overexpression of dHRD1 on locomotor functions. Neuronal overexpression of dHRD1 worsened locomotor functions in flies. Data are presented as means  $\pm$  SD,  $n = 5$ , \*  $p < 0.05$  by Mann-Whitney U test. The age of the flies (d, days after eclosion) used in these experiments are indicated on the top of the graph. The genotypes of the flies were: (Control): elav-GAL4/Y; +/+, (dHRD1<sup>C9</sup>): elav-GAL4/Y; UAS-dHRD1<sup>C9</sup>/+, (dHRD1<sup>E20</sup>): elav-GAL4/Y;; UAS-dHRD1<sup>E20</sup>/+.



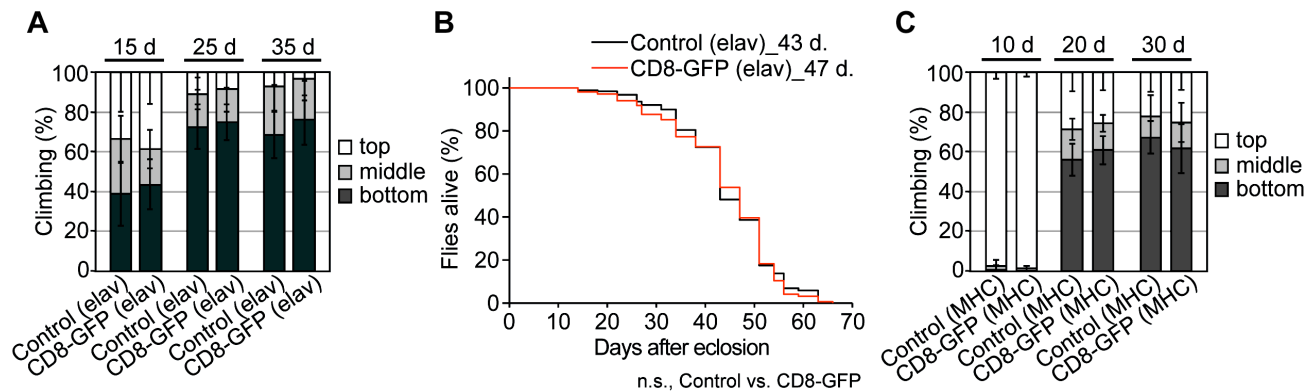

**Figure S6. The effects of CD8-GFP expression in neurons or in muscle on locomotor functions and lifespan in flies, Related to Figure 7**

(A) Neuronal overexpression of control CD8-GFP proteins did not improve locomotor functions in aged flies. (B) Neuronal overexpression of control CD8-GFP protein did not alter medium lifespan of flies (Control: 43d vs CD8-GFP: 47 day). n.s.: no significant difference by Kaplan-Meier survival analyses with log-rank tests ( $n = 189-318$  per group). The genotypes of the flies were: (Control): *elav-GAL4/Y; +/+* and (CD8-GFP): *elav-GAL4/Y; UAS-CD8-GFP/+*. (C) Overexpression of control CD8-GFP proteins in muscle did not improve locomotor functions in flies. The genotypes of the flies were: (Control): *+/Y; MHC-GAL4/+* and (CD8-GFP): *+/Y; MHC-GAL4/UAS-CD8-GFP*. For (A) and (C), data are presented as means  $\pm$  SD,  $n = 5$ . The age of the flies (d, days after eclosion) used in these experiments are indicated on the top of the graph.

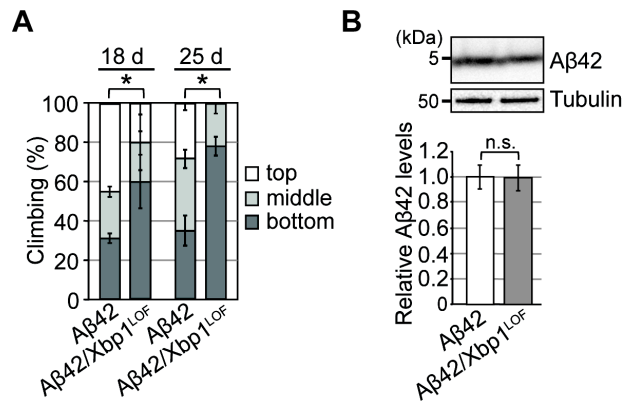

**Figure S7. A loss of one copy of endogenous *Drosophila* Xbp1 significantly worsens behavioral deficits in Aβ42 flies without altering Aβ42 levels, Related to Figure 1 and Discussion**

(A) A heterozygous loss-of-function mutation of Xbp1 (Xbp1<sup>LOF</sup>) worsened locomotor defects in Aβ42 flies. The percentages of flies that stayed at the bottom were subjected to statistical analyses. Data are presented as means ± SD, n = 5, \*p < 0.05 by Mann-Whitney U test. The age of the flies (d, days after eclosion) used in these experiments are indicated on the top of the graph. (B) A heterozygous loss-of-function mutation of Xbp1 did not significantly alter Aβ42 levels in fly brains. Fly heads expressing Aβ42 (Aβ42) or expressing Aβ42 with Xbp1<sup>LOF</sup> (Aβ42/Xbp1<sup>LOF</sup>) were analyzed by western blotting with an anti-Aβ antibody. Tubulin was used as the loading control. Data are presented as means ± SEM, n = 3, n.s.: not significant (Student's t-test). The flies used in these experiments were 7 days old. The genotypes of the flies used in these studies were: (Aβ42): elav-GAL4/Y; UAS-Aβ42/+ and (Aβ42/Xbp1<sup>LOF</sup>): elav-GAL4/Y; UAS-Aβ42/ Xbp1<sup>K13803</sup>.

**Table S1. Summary of a small-scale genetic screen searching for modifiers of neurotoxicity caused by overexpression A $\beta$ 42 peptides in the ER in *Drosophila*, Related to Figure 2**

See attached an Exel file.

**Table S2. Selected candidate genes for 2<sup>nd</sup> screen, Related to Figure 3**

| Function                                    | Gene           | FC in Sin3 KD background |
|---------------------------------------------|----------------|--------------------------|
| <b>ER quality control</b>                   |                |                          |
| <i>Recognition and Targeting</i>            | Hsc70-3/ Bip   | 0.97                     |
|                                             | dEDEM1         | 1.18**                   |
|                                             | dEDEM2         | 1.22**                   |
| <i>Protein disulfide isomerase</i>          | CG9911/ dErp44 | 1.11                     |
|                                             | dERP60         | 1.16***                  |
|                                             | Ero1L          | 1.04                     |
|                                             | CaBp1          | 1.19**                   |
| <i>Retrotranslocation</i>                   | Sec61 $\beta$  | 1.02                     |
|                                             | TER94          | 0.97                     |
|                                             | dDer-1         | 1.43***                  |
|                                             | dDer-2         | 1.22***                  |
| <i>Other possible component</i>             | Spp            | 1.28**                   |
| <i>Ubiquitylation</i>                       | dHRD1          | 0.99                     |
| <i>Proteasomal degradation</i>              | Pros $\beta$ 1 | 1.20***                  |
| <i>Autophagy</i>                            | Atg8a          | 0.75***                  |
|                                             | Atg12          | 1.00                     |
| <b>A<math>\beta</math> degrading enzyme</b> |                |                          |
|                                             | dNEP1          | 2.14*                    |
|                                             | dNEP2          | 1.00                     |
|                                             | dNEP3          | 0.68*                    |
|                                             | dNEP4          | 1.36**                   |
|                                             | dNEP5          | 1.24*                    |
|                                             | dIDE           | 1.69*                    |

mRNA levels in heads of flies carrying elav-GAL4 driver or expressing Sin3A RNAi were analyzed by qRT-PCR and fold change (FC) was calculated for each gene. n = 4-6, \*  $p < 0.05$ , \*\*  $p < 0.01$ , \*\*\*  $p < 0.001$  by Student's *t*-test. The age of flies were 2 days old.

**Table S3. GO terms that are used to select UPR-related genes, Related to Figure 6**

| <b>GO term</b>                                                             |
|----------------------------------------------------------------------------|
| response to heat                                                           |
| protein folding                                                            |
| chaperone mediated protein folding requiring cofactor                      |
| protein disulfide isomerase activity                                       |
| protein disulfide oxidoreductase activity                                  |
| unfolded protein binding                                                   |
| endoplasmic reticulum unfolded protein response                            |
| response to endoplasmic reticulum stress                                   |
| esponse to unfolded protein                                                |
| ER overload response                                                       |
| ER-associated protein catabolic process                                    |
| misfolded or incompletely synthesized protein catabolic process            |
| mannosyl-oligosaccharide 1,2-alpha-mannosidase activity                    |
| SRP-dependent cotranslational protein targeting to membrane, translocation |
| cellular response to unfolded protein                                      |
| heat shock protein binding                                                 |

**Table S4. UPR-related genes that are upregulated in the aged fly brains, Related to Figure 6**

| Probe.Set.ID | Gene.Symbol     | logFC       | adj.P.Val   | Xbp1binding |
|--------------|-----------------|-------------|-------------|-------------|
| 1623635_at   | TotM            | 2.441361439 | 0.00052451  | no          |
| 1629061_s_at | Hsp22.Hsp67Bb   | 2.312429167 | 0.00056134  | no          |
| 1639323_at   | TotC            | 1.250656957 | 0.0012573   | no          |
| 1624748_a_at | Mnn1            | 1.174369144 | 0.004870307 | yes         |
| 1624419_a_at | Cct5            | 0.852993451 | 0.00056134  | no          |
| 1623829_at   | CG31414         | 0.813978743 | 0.017736332 | no          |
| 1630842_s_at | CG32640.CG32641 | 0.702512938 | 0.001004711 | no          |
| 1635549_at   | TotA            | 0.702182483 | 0.001424517 | no          |
| 1627638_s_at | T-cp1           | 0.664774043 | 0.001336964 | no          |
| 1630993_at   | CG31414         | 0.614005521 | 0.008252494 | no          |
| 1626845_at   | Tcp-1eta        | 0.605580053 | 0.001687286 | no          |
| 1636173_s_at | Mpk2            | 0.593744322 | 0.003115818 | no          |
| 1634276_a_at | Adar            | 0.576841466 | 0.033628409 | yes         |
| 1625478_at   | Mnn1            | 0.576053541 | 0.02874686  | yes         |
| 1628660_at   | CG7130          | 0.569537415 | 0.004437182 | no          |
| 1627382_at   | Sec61beta       | 0.555439358 | 0.001687286 | yes         |
| 1640155_at   | Ire1            | 0.55257576  | 0.02961785  | no          |
| 1635293_s_at | CG8336          | 0.523173135 | 0.00793867  | no          |
| 1634866_at   | CG4880          | 0.497885309 | 0.039874646 | no          |
| 1639118_a_at | Hrb87F          | 0.483684953 | 0.005019221 | no          |
| 1626823_a_at | CG7945          | 0.479383787 | 0.002087492 | yes         |
| 1639441_at   | Crc             | 0.477650083 | 0.002797556 | no          |
| 1630132_at   | Tcp-1zeta       | 0.467426041 | 0.002087492 | no          |
| 1625164_at   | TotX            | 0.460798913 | 0.006835104 | no          |
| 1638663_at   | Sec61alpha      | 0.456952561 | 0.00301887  | yes         |
| 1629752_at   | CG5525          | 0.449567777 | 0.004870307 | no          |
| 1630076_at   | Hop             | 0.443850565 | 0.004870307 | no          |
| 1623862_at   | ninaA           | 0.433800794 | 0.005620089 | no          |
| 1640009_at   | unc-45          | 0.433109291 | 0.020994172 | no          |
| 1635355_a_at | Xbp1            | 0.432478725 | 0.005019221 | yes         |
| 1630408_s_at | CG7033          | 0.417198533 | 0.004204303 | no          |
| 1631876_at   | I(2)35Cc        | 0.416981726 | 0.017736332 | no          |
| 1641293_at   | Ire1            | 0.404315929 | 0.017736332 | no          |
| 1637650_at   | CG4164.CR43080  | 0.39661067  | 0.004856144 | no          |
| 1627497_at   | Txl             | 0.392833944 | 0.004204303 | no          |
| 1634700_at   | CG8258          | 0.391704813 | 0.005316561 | no          |
| 1630688_at   | Hsp83           | 0.374431086 | 0.011655979 | yes         |
| 1629598_at   | FK506-bp1       | 0.369666997 | 0.004206514 | no          |

|              |               |             |             |     |
|--------------|---------------|-------------|-------------|-----|
| 1630283_at   | Cdc37         | 0.366216178 | 0.004437182 | no  |
| 1634782_s_at | Cctgamma      | 0.362699235 | 0.005316561 | no  |
| 1636741_s_at | Hsc70Cb       | 0.354266808 | 0.008988232 | no  |
| 1636639_at   | Spp           | 0.352876121 | 0.004870307 | yes |
| 1628008_a_at | TER94         | 0.351800746 | 0.005234996 | yes |
| 1631379_a_at | ERp60         | 0.344570249 | 0.006783745 | yes |
| 1629373_at   | CG5199        | 0.337475479 | 0.037933675 | no  |
| 1626196_at   | CaBP1         | 0.329934675 | 0.006667684 | yes |
| 1623458_at   | Der-2         | 0.328420467 | 0.011655979 | yes |
| 1623256_at   | GstE1         | 0.326752101 | 0.017736332 | no  |
| 1631827_at   | CG15863       | 0.321289979 | 0.013194816 | no  |
| 1637602_at   | CG32801.Edem1 | 0.309513306 | 0.01371786  | no  |
| 1628875_at   | pain          | 0.296304928 | 0.027900852 | no  |
| 1640897_at   | sip3          | 0.294708585 | 0.026181471 | no  |
| 1637059_s_at | DnaJ-1        | 0.292425688 | 0.030605237 | no  |
| 1630637_s_at | Hsc70-4       | 0.291185439 | 0.013054203 | no  |
| 1624372_at   | Der-1         | 0.290466085 | 0.011655979 | yes |
| 1636451_a_at | Atf-2         | 0.285961819 | 0.056033726 | no  |
| 1627525_a_at | Ero1L         | 0.278919193 | 0.011728062 | yes |
| 1625141_at   | CG14715       | 0.277763319 | 0.031187422 | no  |
| 1623009_at   | cyp33         | 0.277018231 | 0.039897493 | no  |
| 1638036_at   | Cyp1          | 0.271893653 | 0.018985071 | yes |
| 1639895_at   | mgr           | 0.262657985 | 0.030605237 | no  |
| 1632200_s_at | CG32801.Edem1 | 0.259797642 | 0.030605237 | no  |
| 1634890_at   | UK114         | 0.2589988   | 0.056033726 | no  |
| 1627399_at   | CG17266       | 0.258424492 | 0.017359287 | no  |
| 1639357_at   | Cypl          | 0.25087234  | 0.056033726 | no  |
| 1636427_a_at | Mt2           | 0.249076418 | 0.03609821  | no  |
| 1624611_a_at | CG2852        | 0.247369659 | 0.027341409 | no  |
| 1624499_s_at | CG9911        | 0.24435137  | 0.017736332 | yes |
| 1635423_s_at | Hsc70-3       | 0.242285241 | 0.037651233 | yes |
| 1628429_at   | Sec61gamma    | 0.241628258 | 0.020994172 | yes |
| 1640995_at   | CG7048        | 0.240704989 | 0.037651233 | yes |
| 1631565_a_at | crc           | 0.225513863 | 0.020994172 | no  |
| 1635861_a_at | Tpr2          | 0.225060075 | 0.034400004 | no  |
| 1636528_at   | Gp93          | 0.219248903 | 0.056854476 | yes |
| 1628831_at   | Torsin        | 0.208617704 | 0.031142506 | no  |
| 1638229_at   | l(3)01239     | 0.197623472 | 0.056854476 | no  |
| 1639419_at   | CG8860        | 0.172910407 | 0.053244191 | no  |

**Table S5. Genotype and age of flies used in this study, Related to Figures 1-7 and STAR Methods**

| Figure # | Label                                 | Genotype                                                  | Age                                                                                                   |
|----------|---------------------------------------|-----------------------------------------------------------|-------------------------------------------------------------------------------------------------------|
| Figure 1 | Control                               | elav-GAL4/Y;+/+                                           | Fig. 1 <b>A</b> (7d), <b>C</b> (25d), <b>G</b> (described in figures).                                |
|          | A $\beta$ 42                          | elav-GAL4/Y;UAS-A $\beta$ 42/+                            | Fig. 1 <b>A</b> (7d), <b>B</b> (20d), <b>C</b> (25d), <b>F</b> (9d), <b>G</b> (described in figures). |
|          | Control                               | elav-GAL4/Y;UAS-Mito-GFP/+                                | Fig. 1 <b>D</b> (10d).                                                                                |
|          | A $\beta$ 42                          | elav-GAL4/Y;UAS-A $\beta$ 42/UAS-Mito-GFP                 | Fig. 1 <b>D</b> (10d).                                                                                |
|          | NHK                                   | elav-GAL4/Y;UAS-NHK/CyO                                   | Fig. 1 <b>E</b> (7d).                                                                                 |
|          | NHK/A $\beta$ 42                      | elav-GAL4/Y;UAS-A $\beta$ 42/UAS-NHK                      | Fig. 1 <b>E</b> (7d).                                                                                 |
|          | A $\beta$ 42/Xbp1-RB                  | elav-GAL4/Y;UAS-A $\beta$ 42/+;UAS-Xbp1-RB/+              | Fig. 1 <b>F</b> (9d), <b>G</b> (described in figures).                                                |
|          | Xbp1-RB                               | elav-GAL4/Y;+/+;UAS-Xbp1-RB/+                             | Fig. 1 <b>G</b> (described in figures).                                                               |
| Figure 2 | A $\beta$ 42                          | elav-GAL4/Y;UAS-A $\beta$ 42/+                            | Fig. 2 <b>A-B</b> (described in figures), <b>C</b> (25d), <b>D</b> (20 or 26d), <b>E</b> (2d).        |
|          | A $\beta$ 42/Sin3A <sup>LOF</sup>     | elav-GAL4/Y;UAS-A $\beta$ 42/Sin3A <sup>08269</sup>       | Fig. 2 <b>A</b> (described in the figure), <b>C</b> (25d).                                            |
|          | Control                               | elav-GAL4/Y;+/+                                           | Fig. 2 <b>A</b> (described in figures), <b>C</b> (25d).                                               |
|          | Sin3A <sup>LOF</sup>                  | elav-GAL4/Y;Sin3A <sup>08269</sup> /+                     | Fig. 2 <b>A</b> (described in figures).                                                               |
|          | A $\beta$ 42/Sin3A RNAi <sup>GD</sup> | elav-GAL4/Y;UAS-A $\beta$ 42/UAS-Sin3A RNAi <sup>GD</sup> | Fig. 2 <b>B</b> (described in figures), <b>D</b> (20d)                                                |
|          | A $\beta$ 42/Sin3A RNAi <sup>KK</sup> | elav-GAL4/Y;UAS-A $\beta$ 42/UAS-Sin3A RNAi <sup>KK</sup> | Fig. 2 <b>B</b> (described in figures), <b>C</b> (25d), <b>D</b> (26d), <b>E</b> (2d).                |
|          | CD8-GFP                               | elav-GAL4/Y;UAS-CD8-GFP/+                                 | Fig. 2 <b>F</b> (7d).                                                                                 |
|          | CD8-GFP/Sin3A RNAi <sup>GD</sup>      | elav-GAL4/Y;UAS-CD8-GFP/UAS-Sin3A RNAi <sup>GD</sup>      | Fig. 2 <b>F</b> (7d).                                                                                 |
| Figure 3 | Control                               | elav-GAL4/Y;+/+                                           | Fig. 3 <b>A</b> (2d), <b>C</b> (7d), <b>J</b> (2d).                                                   |
|          | Sin3A RNAi <sup>GD</sup>              | elav-GAL4/Y;UAS-Sin3A RNAi <sup>GD</sup> /+               | Fig. 3 <b>A</b> (2d), <b>J</b> (2d).                                                                  |
|          | A $\beta$ 42                          | elav-GAL4/Y;UAS-A $\beta$ 42/+                            | Fig. 3 <b>B</b> (2d), <b>E-F</b> (24d), <b>K</b> (2d).                                                |
|          | A $\beta$ 42/Sin3A RNAi <sup>GD</sup> | elav-GAL4/Y;UAS-A $\beta$ 42/UAS-Sin3A RNAi <sup>GD</sup> | Fig. 3 <b>B</b> (2d), <b>K</b> (2d).                                                                  |
|          | dEDEM1                                | elav-GAL4/Y;;UAS-dEDEM1/+                                 | Fig. 3 <b>C</b> (7d).                                                                                 |
|          | E123Q                                 | elav-GAL4/Y;;UAS-dEDEM1-E123Q/+                           | Fig. 3 <b>C</b> (7d).                                                                                 |
|          | dEDEM2                                | elav-GAL4/Y;;UAS-dEDEM2/+                                 | Fig. 3 <b>C</b> (7d).                                                                                 |
|          | E144Q                                 | elav-GAL4/Y;;UAS-dEDEM2-E144Q/+                           | Fig. 3 <b>C</b> (7d).                                                                                 |
|          | NHK                                   | elav-GAL4/Y;UAS-NHK/+                                     | Fig. 3 <b>D</b> (7d).                                                                                 |
|          | NHK/dEDEM1                            | elav-GAL4/Y;UAS-NHK/+;UAS-dEDEM1/+                        | Fig. 3 <b>D</b> (7d).                                                                                 |
|          | NHK/E123Q                             | elav-GAL4/Y;UAS-NHK/+;UAS-dEDEM1-E123Q/+                  | Fig. 3 <b>D</b> (7d).                                                                                 |
|          | NHK/dEDEM2                            | elav-GAL4/Y;UAS-NHK/+;UAS-dEDEM2/+                        | Fig. 3 <b>D</b> (7d).                                                                                 |
|          | NHK/E144Q                             | elav-GAL4/Y;UAS-NHK/+;UAS-dEDEM2-E144Q/+                  | Fig. 3 <b>D</b> (7d).                                                                                 |
|          | A $\beta$ 42/dEDEM1                   | elav-GAL4/Y;UAS-A $\beta$ 42/+;UAS-dEDEM1/+               | Fig. 3 <b>E-F</b> (24d).                                                                              |
|          | A $\beta$ 42/E123Q                    | elav-GAL4/Y;UAS-A $\beta$ 42/+;UAS-dEDEM1-E123Q/+         | Fig. 3 <b>E-F</b> (24d).                                                                              |
|          | A $\beta$ 42/dEDEM2                   | elav-GAL4/Y;UAS-A $\beta$ 42/+;UAS-dEDEM2/+               | Fig. 3 <b>E-F</b> (24d).                                                                              |
|          | A $\beta$ 42/E144Q                    | elav-GAL4/Y;UAS-A $\beta$ 42/+;UAS-dEDEM2-E144Q/+         | Fig. 3 <b>E-F</b> (24d).                                                                              |
|          | A $\beta$ 42                          | +Y;GMR-GAL4,UAS-A $\beta$ 42/+                            | Fig. 3 <b>G-H</b> (7d).                                                                               |
|          | A $\beta$ 42/dEDEM1                   | +Y;GMR-GAL4,UAS-A $\beta$ 42/+;UAS-dEDEM1/+               | Fig. 3 <b>G-H</b> (7d).                                                                               |
|          | A $\beta$ 42/E123Q                    | +Y;GMR-GAL4,UAS-A $\beta$ 42/+;UAS-dEDEM1-E123Q/+         | Fig. 3 <b>G-H</b> (7d).                                                                               |
|          | A $\beta$ 42/dEDEM2                   | +Y;GMR-GAL4,UAS-A $\beta$ 42/+;UAS-dEDEM2/+               | Fig. 3 <b>G-H</b> (7d).                                                                               |



|          |                                    |                                                     |                                                                                     |
|----------|------------------------------------|-----------------------------------------------------|-------------------------------------------------------------------------------------|
|          | Aβ42/E144Q                         | +Y;GMR-GAL4,UAS-Aβ42/+;UAS-dEDEM2-E144Q/+           | Fig. 3 <b>G-H</b> (7d).                                                             |
| Figure 4 | Aβ42                               | elav-GAL4/Y;UAS-Aβ42/+                              | Fig. 4 <b>A</b> (described in the figure), <b>B</b> (25d).                          |
|          | Aβ42/dEDEM1                        | elav-GAL4/Y;UAS-Aβ42/+;UAS-dEDEM1/+                 | Fig. 4 <b>A</b> (described in the figure), <b>B</b> (25d).                          |
|          | Aβ42/E123Q                         | elav-GAL4/Y;UAS-Aβ42/+;UAS-dEDEM1-E123Q/+           | Fig. 4 <b>A</b> (described in the figure), <b>B</b> (25d).                          |
|          | Aβ42/dEDEM2                        | elav-GAL4/Y;UAS-Aβ42/+;UAS-dEDEM2/+                 | Fig. 4 <b>A</b> (described in the figure), <b>B</b> (25d).                          |
|          | Aβ42/E144Q                         | elav-GAL4/Y;UAS-Aβ42/+;UAS-dEDEM2-E144Q/+           | Fig. 4 <b>A</b> (described in the figure), <b>B</b> (25d).                          |
|          | Aβ42                               | +/+;GMR-GAL4,UAS-Aβ42/+                             | Fig. 4 <b>C</b> (7d).                                                               |
|          | Aβ42/CD8-GFP                       | +/+;GMR-GAL4,UAS-Aβ42/+, UAS-CD8-GFP                | Fig. 4 <b>C</b> (7d).                                                               |
|          | Aβ42/dEDEM1                        | +/+;GMR-GAL4,UAS-Aβ42/+;UAS-dEDEM1/+                | Fig. 4 <b>C</b> (7d).                                                               |
|          | Aβ42/E123Q                         | +/+;GMR-GAL4,UAS-Aβ42/+;UAS-dEDEM1-E123Q/+          | Fig. 4 <b>C</b> (7d).                                                               |
|          | Aβ42/dEDEM2                        | +/+;GMR-GAL4,UAS-Aβ42/+;UAS-dEDEM2/+                | Fig. 4 <b>C</b> (7d).                                                               |
|          | Aβ42/E144Q                         | +/+;GMR-GAL4,UAS-Aβ42/+;UAS-dEDEM2-E144Q/+          | Fig. 4 <b>C</b> (7d).                                                               |
| Figure 5 | Aβ42                               | elav-GAL4/Y;UAS-Aβ42/+                              | Fig. 5 <b>A</b> (7d), <b>E</b> (24d), <b>B</b> and <b>F</b> (described in figures). |
|          | Aβ42                               | elav-GAL4/Y;;UAS-Aβ42/+                             | Fig. 5 <b>C</b> (10d), <b>D</b> (described in the figure).                          |
|          | Aβ42/Bip                           | elav-GAL4/Y;UAS-Aβ42/UAS-Hsc70-3/Bip                | Fig. 5 <b>A</b> (7d), <b>B</b> (described in the figure).                           |
|          | Aβ42/dHRD1 <sup>C9</sup>           | elav-GAL4/Y; UAS-dHRD1 <sup>C9</sup> /+;UAS-Aβ42/+. | Fig. 5 <b>D</b> (described in the figure).                                          |
|          | Aβ42/dHRD1 <sup>E20</sup>          | elav-GAL4/Y;;UAS-Aβ42/UAS-dHRD1 <sup>E20</sup> .    | Fig. 5 <b>C</b> (10d), <b>D</b> (described in the figure).                          |
|          | Aβ42/Rpn11                         | elav-GAL4/Y;UAS-Aβ42/UAS-Rpn11                      | Fig. 5 <b>E</b> (24d), <b>F</b> (described in the figure).                          |
| Figure 6 | 7 day-old and 30 day-old           | elav-GAL4/Y;+/+                                     | Fig. 6 <b>A-B</b> (described in figures).                                           |
|          | Young                              | +Y;elav-GeneSwitch/UAS-NHK                          | Fig. 6 <b>C</b> (7d).                                                               |
|          | Aged                               | +Y;elav-GeneSwitch/UAS-NHK                          | Fig. 6 <b>C</b> (30d).                                                              |
|          | 1 week and 3 weeks                 | elav-GAL4/Y;UAS-CD35-YFP/+                          | Fig. 6 <b>D-E</b> (described in figures).                                           |
| Figure 7 | Control                            | elav-GAL4/Y;+/+                                     | Fig. 7 <b>A-B</b> and <b>G</b> (described in figures), <b>H</b> (7d).               |
|          | dEDEM1                             | elav-GAL4/Y;+/+;UAS-dEDEM1/+                        | Fig. 7 <b>A-B</b> and <b>G</b> (described in figures), <b>H</b> (7d).               |
|          | E123Q                              | elav-GAL4/Y;+/+;UAS-dEDEM1-E123Q/+                  | Fig. 7 <b>A-B</b> (described in figures).                                           |
|          | dEDEM2                             | elav-GAL4/Y;+/+;UAS-dEDEM2/+                        | Fig. 7 <b>A-B</b> and <b>G</b> (described in figures), <b>H</b> (7d).               |
|          | E144Q                              | elav-GAL4/Y;+/+;UAS-dEDEM2-E144Q/+                  | Fig. 7 <b>A-B</b> (described in figures).                                           |
|          | Control                            | +Y;MHC-GAL4/+                                       | Fig. 7 <b>C-D</b> (described in figures).                                           |
|          | dEDEM1                             | +Y;MHC-GAL4/+;UAS-dEDEM1/+                          | Fig. 7 <b>C-D</b> (described in figures).                                           |
|          | E123Q                              | +Y;MHC-GAL4/+;UAS-dEDEM1-E123Q/+                    | Fig. 7 <b>C-D</b> (described in figures).                                           |
|          | dEDEM2                             | +Y;MHC-GAL4/+;UAS-dEDEM2/+                          | Fig. 7 <b>C-D</b> (described in figures).                                           |
|          | E144Q                              | +Y;MHC-GAL4/+;UAS-dEDEM2-E144Q/+                    | Fig. 7 <b>C-D</b> (described in figures).                                           |
|          | Control                            | +Y;Myo1A-GAL4/+                                     | Fig. 7 <b>E-F</b> (described in figures).                                           |
|          | dEDEM1                             | +Y;Myo1A-GAL4/+;UAS-dEDEM1/+                        | Fig. 7 <b>E-F</b> (described in figures).                                           |
|          | E123Q                              | +Y;Myo1A-GAL4/+;UAS-dEDEM1-E123Q/+                  | Fig. 7 <b>E-F</b> (described in figures).                                           |
|          | dEDEM2                             | +Y;Myo1A-GAL4/+;UAS-dEDEM2/+                        | Fig. 7 <b>E-F</b> (described in figures).                                           |
| E144Q    | +Y;Myo1A-GAL4/+;UAS-dEDEM2-E144Q/+ | Fig. 7 <b>E-F</b> (described in figures).           |                                                                                     |

**Table S6. Primer sequences for qRT-PCR, Related to STAR Methods**

| Name                                   | Sequence                        | Product size |
|----------------------------------------|---------------------------------|--------------|
| PERK ( <i>Drosophila</i> ), Forward    | 5'- CTGCGCAGTCTTCGGGACGG -3'    | 241 bp       |
| PERK ( <i>Drosophila</i> ), Reverse    | 5'- AGCTGCTGAAGGTGCGGCTG -3'    |              |
| Xbp1-RB ( <i>Drosophila</i> ), Forward | 5'- CAACCTTGGATCTGCCGCAGGG -3'  | 238 bp       |
| Xbp1-RB ( <i>Drosophila</i> ), Reverse | 5'- CGCTCCAGCGCCTGTTTCCAG -3'   |              |
| NHK (Human), Forward                   | 5'- CCAAGGCTGACACTCAGCAT -3'    | 181 bp       |
| NHK (Human), Reverse                   | 5'- TCCACTAGCTTCAGGCCCTC -3'    |              |
| dHRD1 ( <i>Drosophila</i> ), Forward   | 5'- AGCCAGCTCAGCGTCTCCGA -3'    | 109 bp       |
| dHRD1 ( <i>Drosophila</i> ), Reverse   | 5'- GCTAACTGCCTCCGTGGCCG -3'    |              |
| Sin3A ( <i>Drosophila</i> ), Forward   | 5'- ATGTCCACCGAGGAATTGAG -3'    | 227 bp       |
| Sin3A ( <i>Drosophila</i> ), Reverse   | 5'- CGCCATTGCTTATTGAAGGT -3'    |              |
| Aβ42 (Human), Forward                  | 5'- GCGCAGTTCCTGAGACTTTGC -3'   | 211 bp       |
| Aβ42 (Human), Reverse                  | 5'- GACAACACCGCCCACCATGAG -3'   |              |
| dEDEM1 ( <i>Drosophila</i> ), Forward  | 5'- TCCTCGCCCCAGTTGGCTCA -3'    | 144 bp       |
| dEDEM1 ( <i>Drosophila</i> ), Reverse  | 5'- AATGCGAACACCGGCCTCCG -3'    |              |
| dEDEM2 ( <i>Drosophila</i> ), Forward  | 5'- CAAAGCGCGACTGGCCCAGA -3'    | 175 bp       |
| dEDEM2 ( <i>Drosophila</i> ), Reverse  | 5'- GACCGCCGACAGTTTGCCGA -3'    |              |
| Bip ( <i>Drosophila</i> ), Forward     | 5'- TCCCGATGCCGATCCCGAGG -3'    | 95 bp        |
| Bip ( <i>Drosophila</i> ), Reverse     | 5'- CGCCAGCACCTGGTACAGC -3'     |              |
| dNEP1 ( <i>Drosophila</i> ), Forward   | 5'- GATGACGCAGGGCGAGAA -3'      | 150 bp       |
| dNEP1 ( <i>Drosophila</i> ), Reverse   | 5'- TGGGCGTAGTTGAGAAAGAACA -3'  |              |
| dNEP2 ( <i>Drosophila</i> ), Forward   | 5'- CCGCAGATGGGCTGAGAA -3'      | 150 bp       |
| dNEP2 ( <i>Drosophila</i> ), Reverse   | 5'- TGCACGCCGGTAGTAATACG -3'    |              |
| dNEP3 ( <i>Drosophila</i> ), Forward   | 5'- GTCCAGCCGCACCAAAAA -3'      | 150 bp       |
| dNEP3 ( <i>Drosophila</i> ), Reverse   | 5'- CCATTGATTGCAGGAATATCCA -3'  |              |
| dNEP4 ( <i>Drosophila</i> ), Forward   | 5'- ACGCTCTCGAACTCCGTTGA -3'    | 150 bp       |
| dNEP4 ( <i>Drosophila</i> ), Reverse   | 5'- AGGAATGTGTGGCATATGTCATG -3' |              |
| dNEP5 ( <i>Drosophila</i> ), Forward   | 5'- GCACCCACCTGGAGAACCT -3'     | 151 bp       |
| dNEP5 ( <i>Drosophila</i> ), Reverse   | 5'- GGCACAGTGATTGCATTCTGA -3'   |              |
| dIDE ( <i>Drosophila</i> ), Forward    | 5'- TGGCGCCGGACAAGTT -3'        | 150 bp       |
| dIDE ( <i>Drosophila</i> ), Reverse    | 5'- GCTTGATGCGCCACAGATC -3'     |              |
| Atg8a ( <i>Drosophila</i> ), Forward   | 5'- CTGCTGCGCACGGTCACTCT -3'    | 259 bp       |
| Atg8a ( <i>Drosophila</i> ), Reverse   | 5'- CCGGGGCAGGTGCAAATGTCTG -3'  |              |
| Atg12 ( <i>Drosophila</i> ), Forward   | 5'- TGAACGCCACTGGCAATGTGC -3'   | 162 bp       |
| Atg12 ( <i>Drosophila</i> ), Reverse   | 5'- CCGGGGCAGGTGCAAATGTCTG -3'  |              |
| Rpn11 ( <i>Drosophila</i> ), Forward   | 5'- TTCCATCAACGAGGACACC -3'     | 150 bp       |
| Rpn11 ( <i>Drosophila</i> ), Reverse   | 5'- ACCTTCTCCTCCAAATGCCG -3'    |              |
| Gp93 ( <i>Drosophila</i> ), Forward    | 5'- CTGACCCAGACGCACTTCAT -3'    | 150 bp       |
| Gp93 ( <i>Drosophila</i> ), Reverse    | 5'- GTCGGTGATGAAAACACGGC -3'    |              |

|                                               |                                |        |
|-----------------------------------------------|--------------------------------|--------|
| dDer-1 ( <i>Drosophila</i> ), Forward         | 5'- TGGCCGCCTTCGAGTTTATT -3'   | 143 bp |
| dDer-1 ( <i>Drosophila</i> ), Reverse         | 5'- CTTCAAGAACTGCGGCGTTT -3'   |        |
| dDer-2 ( <i>Drosophila</i> ), Forward         | 5'- ACACTGTCCAACGGCTACAG -3'   | 178 bp |
| dDer-2 ( <i>Drosophila</i> ), Reverse         | 5'- CCTCATCCTGTCCATCAGCC -3'   |        |
| CG9911 ( <i>Drosophila</i> ), Forward         | 5'- TCAGTGACATGTACTCGCCG -3'   | 176 bp |
| CG9911 ( <i>Drosophila</i> ), Reverse         | 5'- GGATGGGCCAAGTTCCTTGA -3'   |        |
| CaBP1 ( <i>Drosophila</i> ), Forward          | 5'- TCTCCAAGGACGGCATCAAC -3'   | 110 bp |
| CaBP1 ( <i>Drosophila</i> ), Reverse          | 5'- CCAAGGATCCACGGACACAA -3'   |        |
| CG7945 ( <i>Drosophila</i> ), Forward         | 5'- ACATGAGCGAAGCTGAACGA -3'   | 104 bp |
| CG7945 ( <i>Drosophila</i> ), Reverse         | 5'- AGAGTTGTCCCGAACAGTGC -3'   |        |
| Sec61 $\beta$ ( <i>Drosophila</i> ), Forward  | 5'- GTGGCATGTGGCGTTTCTAC -3'   | 103 bp |
| Sec61 $\beta$ ( <i>Drosophila</i> ), Reverse  | 5'- AGCATGAAGACGGAAGCGAT -3'   |        |
| Sec61 $\gamma$ ( <i>Drosophila</i> ), Forward | 5'- CCGCAAGGAGTTCAGAAAGA -3'   | 130 bp |
| Sec61 $\gamma$ ( <i>Drosophila</i> ), Reverse | 5'- TCAGCGCATTTAAGAGCCCA -3'   |        |
| TER94 ( <i>Drosophila</i> ), Forward          | 5'- AACTGTTGTTGAGGTGCCCA -3'   | 132 bp |
| TER94 ( <i>Drosophila</i> ), Reverse          | 5'- GGCTGCATGCCAAACTTCAA -3'   |        |
| Hsp83 ( <i>Drosophila</i> ), Forward          | 5'- AAGCAGCTGGAGATCAACCC -3'   | 143 bp |
| Hsp83 ( <i>Drosophila</i> ), Reverse          | 5'- TCCAGCGAGAATCCAGAGGA -3'   |        |
| dERp60 ( <i>Drosophila</i> ), Forward         | 5'- GGCTCGCGACGAAAAGAATC -3'   | 134 bp |
| dERp60 ( <i>Drosophila</i> ), Reverse         | 5'- TCGACTCGGGAATAGGCTCA -3'   |        |
| Spp ( <i>Drosophila</i> ), Forward            | 5'- CAAGCTAGTGTTCCTCCAGG -3'   | 187 bp |
| Spp ( <i>Drosophila</i> ), Reverse            | 5'- CAGGCCAAGGAAGTAGGCAA -3'   |        |
| Ero1L ( <i>Drosophila</i> ), Forward          | 5'- CACTGGCTGCGAAACCTCTA -3'   | 184 bp |
| Ero1L ( <i>Drosophila</i> ), Reverse          | 5'- CGTTCTCGTCGAAGTGGGAT -3'   |        |
| Pros $\beta$ 1 ( <i>Drosophila</i> ), Forward | 5'- CCACGATGGCAGCTCCGGTG -3'   | 102 bp |
| Pros $\beta$ 1 ( <i>Drosophila</i> ), Reverse | 5'- ACAGCCGATGCGCCCGATTC -3'   |        |
| Actin ( <i>Drosophila</i> ), Forward          | 5'- TGCACCGCAAGTGCTTCTAA -3'   | 150 bp |
| Actin ( <i>Drosophila</i> ), Reverse          | 5'- TGCTGCACTCCAACTTCCA -3'    |        |
| RP49/RpL32 ( <i>Drosophila</i> ), Forward     | 5'- GCTAAGCTGTGCGACAAATG -3'   | 105 bp |
| RP49/RpL32 ( <i>Drosophila</i> ), Reverse     | 5'- GTTCGATCCGTAACCGATGT -3'   |        |
| GAPDH1 ( <i>Drosophila</i> ), Forward         | 5'- GACGAAATCAAGGCTAAGGTCG -3' | 109 bp |
| GAPDH1 ( <i>Drosophila</i> ), Reverse         | 5'- AATGGGTGTCGCTGAAGAAGTC -3' |        |
| CD3 $\delta$ ( <i>Drosophila</i> ), Forward   | 5'- CATGGGTAGAGGGAACGGTG -3'   | 164 bp |
| CD3 $\delta$ ( <i>Drosophila</i> ), Reverse   | 5'- ACAGCTCTGGCACATTCGAT -3'   |        |
